# Supplementary figures and images for: Geometry Does Impact on the Plane Strain Directions of the Human Left Ventricle, Irrespective of Disease
Source: MDPI journal article supplement (doi:10.3390/jcdd9110393), 2022-11-15

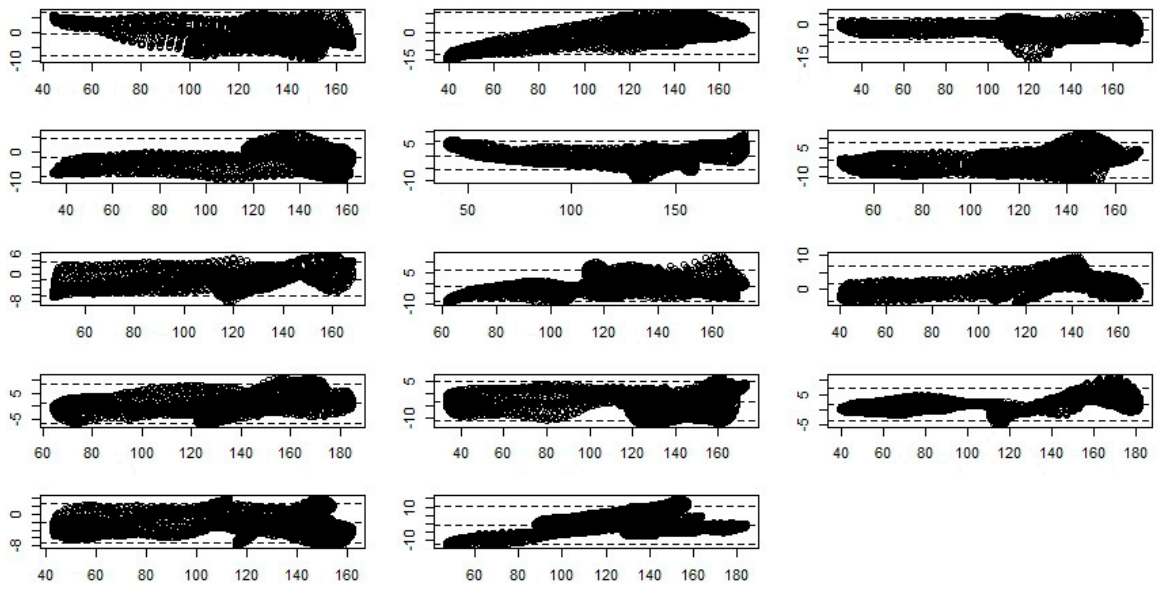

Figure S1. The 14 Bland–Altman plots.

Supplement: s1 [file s1]
